# Supplementary material for: Online coupling lab on valve-dispersive liquid–liquid microextraction-multisyringe flow injection with gas chromatography-mass spectrometry for the determination of sixteen priority PAHs in water
Source: Royal Society of Chemistry journal article supplement (doi:10.1039/c4ay00179f), 2014-01-01
Supplement: c4ay00179f1.pdf [file c4ay00179f1.pdf]

## Supporting Information

Sabrina Clavijo<sup>†</sup>, Mailén Fernández<sup>†</sup>, Rafael Forteza<sup>†</sup>, Maria del Rosario Brunetto<sup>‡</sup> and Víctor Cerdà<sup>†\*</sup>

### **On line coupling lab on valve - dispersive liquid-liquid microextraction - multisyringe flow injection with Gas Chromatography - Mass Spectrometry for the determination of sixteen priority PAHs in water**

<sup>†</sup>Laboratory of Environmental Analytical Chemistry, University of the Balearic Islands, Carretera de  
Valldemosa km 7.5, E-07122 Palma de Mallorca, Spain

<sup>‡</sup>Laboratorio de Espectroscopia Molecular, Departamento de Química, Facultad de Ciencias, Universidad de  
Los Andes, Apartado Postal 3, Ipostel La Hechicera, Mérida 5101-A, Venezuela

\*corresponding author: victor.cerda@uib.es, Phone: 971173261, fax: 971173426

## Table of contents

Five supporting materials are given

- **Table S-1.** Analytical sequence for the automated preconcentration of PAHs prior to GC separation and MS quantification by the LOV-DLLME-MSFIA system.
- **Figure S-2.** Effect of the type of extracting solvent on the extraction recovery (n = 3) Experimental conditions: PAHs concentration: 50 µg/L; IS concentration: 10 µg/L; aqueous sample: 4 mL, extracting solvent: 100 µL; dispersive solvent 900 µL.
- **Figure S-3.** Effect of the volume of extracting solvent on extraction recovery (n = 3). Experimental conditions PAHs concentration: 50 µg/L; IS concentration: 10 µg/L; aqueous sample: 4 mL, extracting solvent: 100 µL; dispersive solvent 900 µL.
- **Figure S-4.** Effect of the type of dispersive solvent on the extraction recovery (n = 3) Experimental conditions PAHs concentration: 50 µg/L; IS concentration: 10 µg/L; aqueous sample: 4 mL, extracting solvent: 100 µL; dispersive solvent 900 µL.
- **Figure S-5.** Effect of the volume of dispersive solvent on the extraction recovery (n = 3). Experimental conditions PAHs concentration: 50 µg/L; IS concentration: 10 µg/L; aqueous sample: 4 mL, extracting solvent: 100 µL; dispersive solvent 900 µL.

**Table S-1...**

| Sequence and description |                                                                           | LOV position | Flow rate (mL/min) | Volume (µL) |
|--------------------------|---------------------------------------------------------------------------|--------------|--------------------|-------------|
| 1                        | Sample loading into HC                                                    |              |                    |             |
| Aspirate                 | sample into HC                                                            | 2            | 1.0                | 4000        |
| Aspirate                 | acetonitrile into HC                                                      | 5            | 0.8                | 900         |
| Aspirate                 | trichloroethylene into HC                                                 | 4            | 0.5                | 100         |
| 2                        | DLLME extraction into EC                                                  |              |                    |             |
| Dispense                 | mix of solvents into EC                                                   | 6            | 15.0               | 5000        |
|                          | wait 30 seconds                                                           |              |                    |             |
| Aspirate                 | dead volume portion into HC                                               | 6            | 0.5                | 0.05        |
| Dispense                 | dead volume portion to waste                                              | 1            | 0.5                | 0.05        |
| 3                        | Transportation of eluate into GC                                          |              |                    |             |
|                          | injection valve moves to “load”                                           |              |                    |             |
|                          | start loop: sample loading                                                |              |                    |             |
| Aspirate                 | eluate into HC                                                            | 6            | 0.5                | 0.02        |
| Dispense                 | into micro loop                                                           | 2            | 0.5                | 0.02        |
| 4                        | Eluate injection into GC                                                  |              |                    |             |
|                          | injection valve moves to “inject” and solenoid valve switches to GC-MS    |              |                    |             |
| Aspirate                 | air into S2                                                               |              | 15                 | 1000        |
| Dispense                 | air to completely deliver the eluate via air streaming to the CG injector |              | 15                 | 1000        |
|                          | wait 20 seconds                                                           |              |                    |             |
|                          | Activation of GC-MS instrument                                            |              |                    |             |
|                          | End loop: repeat three fold from sample loading loop                      |              |                    |             |
| 5                        | System conditioning                                                       |              |                    |             |
| Aspirate                 | sample mixture into HC                                                    | 6            | 2.5                | 5000        |
| Dispense                 | sample mixture to waste                                                   | 1            | 2.5                | 5000        |

|                                              |                                                                                       |   |     |      |
|----------------------------------------------|---------------------------------------------------------------------------------------|---|-----|------|
| Start loop cleaning EC                       |                                                                                       |   |     |      |
| Dispense                                     | cleaning EC with carrier solvent (acetonitrile:water 95:5)                            | 6 | 5   | 2000 |
| Aspirate                                     | carrier solvent from EC into HC                                                       | 6 | 2.5 | 2000 |
| Dispense                                     | carrier solvent from HC to waste                                                      | 1 | 2.5 | 2000 |
| End loop: repeat three fold from cleaning EC |                                                                                       |   |     |      |
|                                              | injection valve moves to "load" and solenoid valve switches to waste                  |   |     |      |
| Aspirate                                     | acetonitrile into HC                                                                  | 5 | 2.5 | 500  |
|                                              | injection valve moves to "inject"                                                     |   |     |      |
| Dispense                                     | air to completely deliver the acetonitrile via air segmentation to the solenoid valve | 2 | 15  | 500  |

---

Analytical sequence for the automated preconcentration of PAHs prior to GC separation and MS quantification by the LOV-DLLME-MSFIA system

Figure. S-2

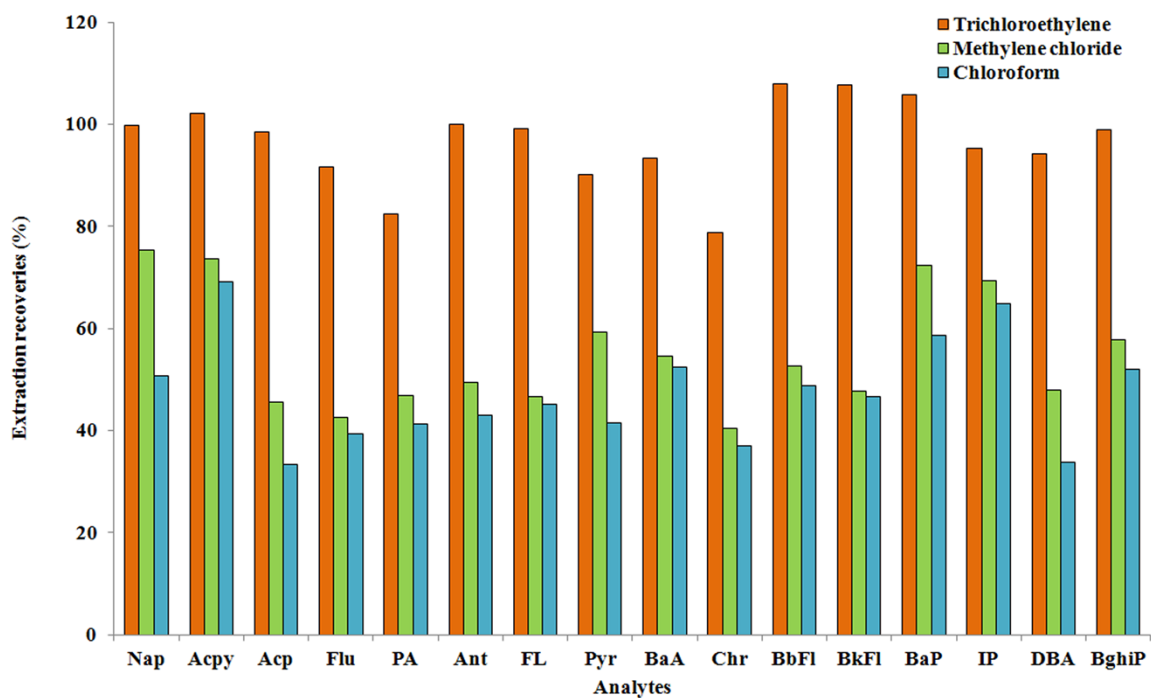

Effect of the type of extracting solvent on the extraction recovery (n = 3) Experimental conditions: PAHs concentration: 50 µg/L; IS concentration: 10 µg/L; aqueous sample: 4mL, extracting solvent: 100 µL; dispersive solvent 900 µL

Figure S-3

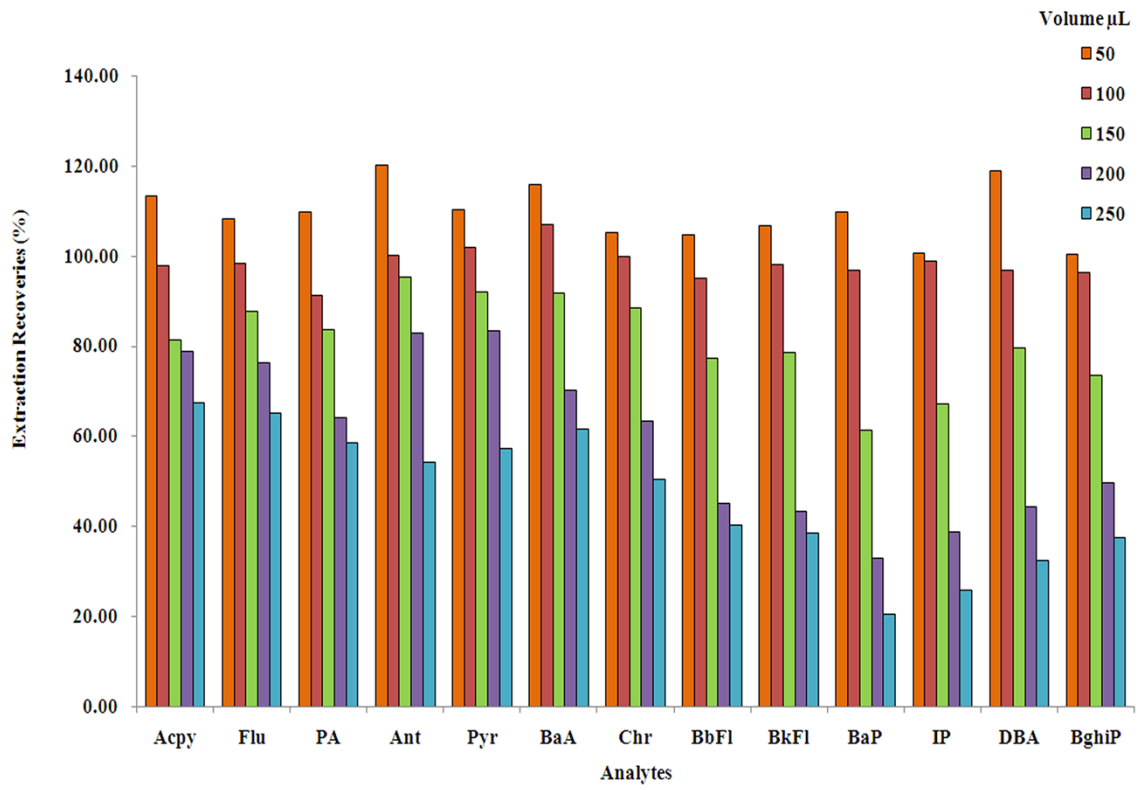

Effect of the volume of extracting solvent on the extraction recovery (n = 3): Experimental conditions PAHs concentration: 50 µg/L; IS concentration: 10 µg/L; aqueous sample: 4mL, dispersive solvent 900 µL

Figure S-4

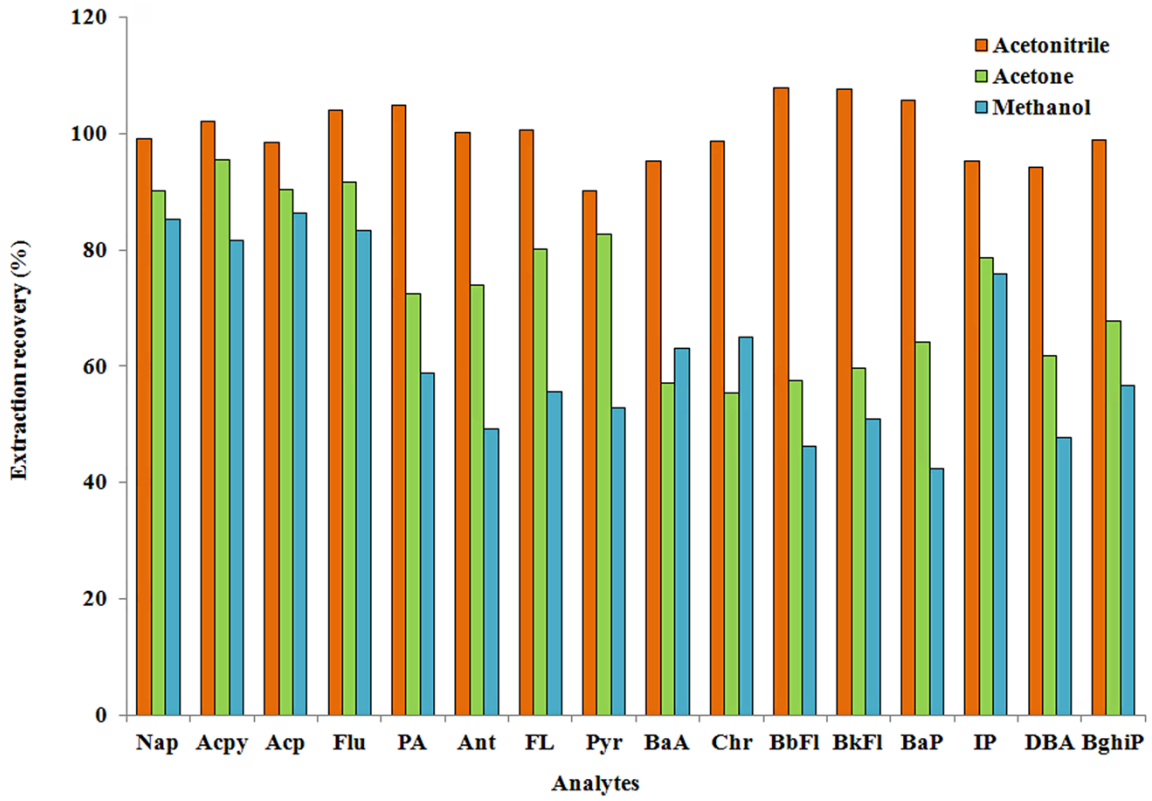

Effect of the type of dispersive solvent on the extraction recovery (n = 3) Experimental conditions PAHs concentration: 50 µg/L; IS concentration: 10 µg/L; aqueous sample: 4 mL, extracting solvent: 100 µL; dispersive solvent 900 µL

Figure. S-5

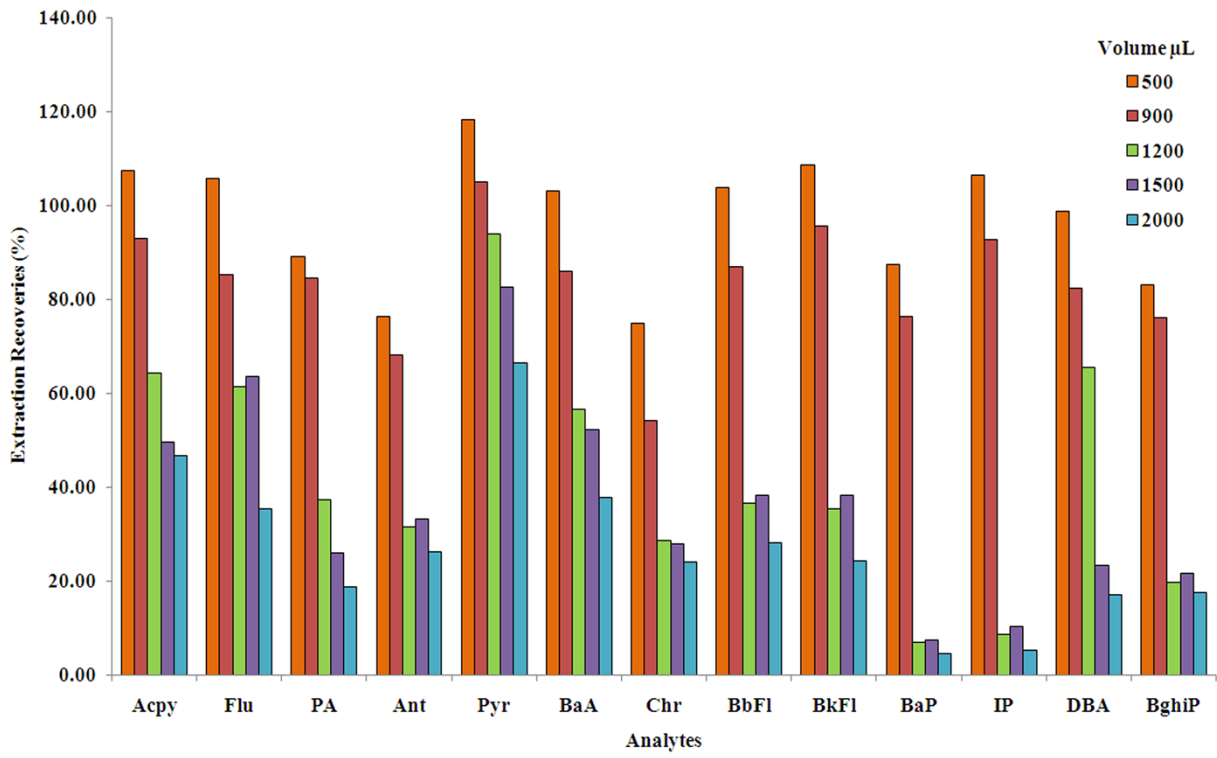

Effect of the volume of dispersive solvent on the extraction recovery (n = 3): Experimental conditions PAHs

concentration: 50 µg/L; IS concentration: 10 µg/L; aqueous sample: 4mL, extracting solvent: 100
